# Supplementary figures and images for: Inherited TNFSF9 deficiency causes broad Epstein–Barr virus infection with EBV+ smooth muscle tumors
Source: PubMed Central journal article supplement — J Exp Med. 2022 Jun 3;219(7):e20211682. doi: 10.1084/jem.20211682 (PMC9170382; doi:10.1084/jem.20211682), 2022-06-03

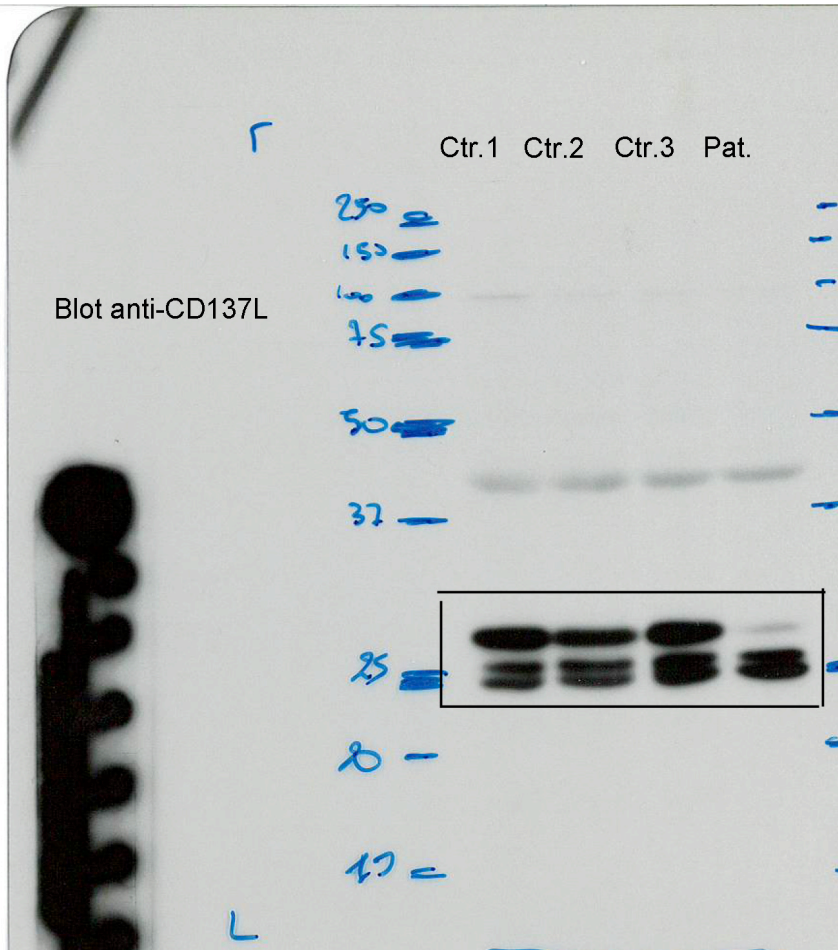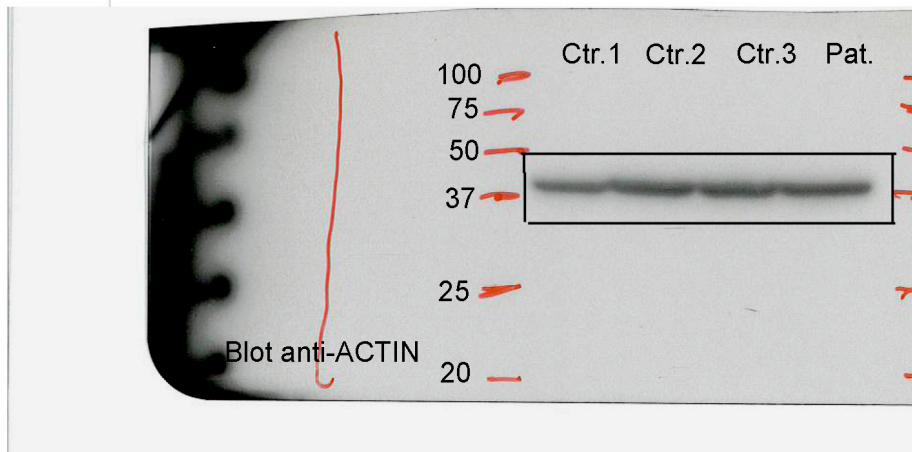

Source data for Figure 2 panel C

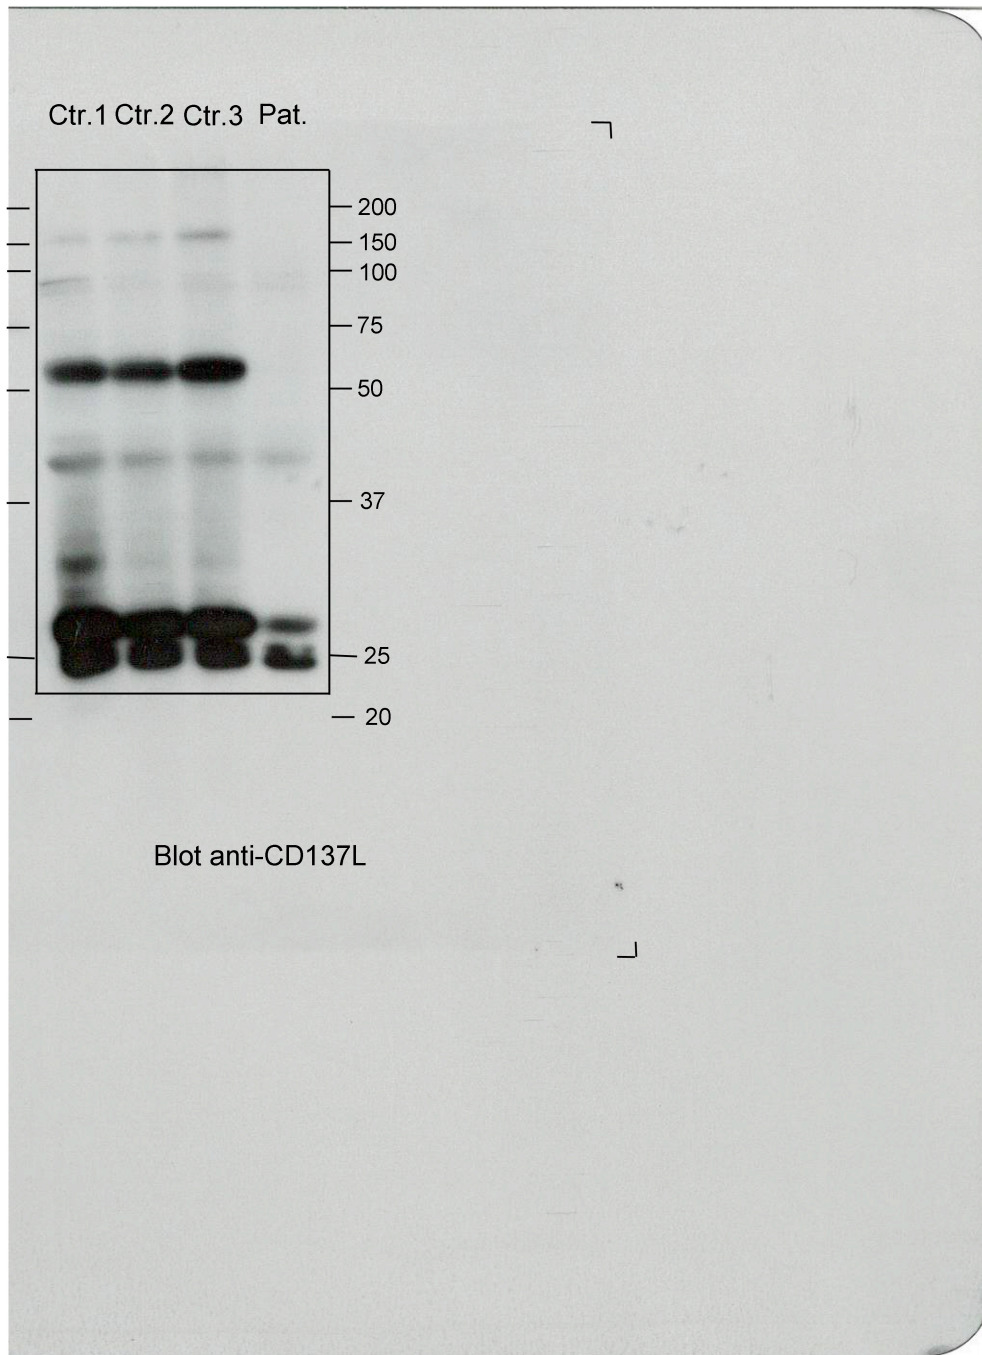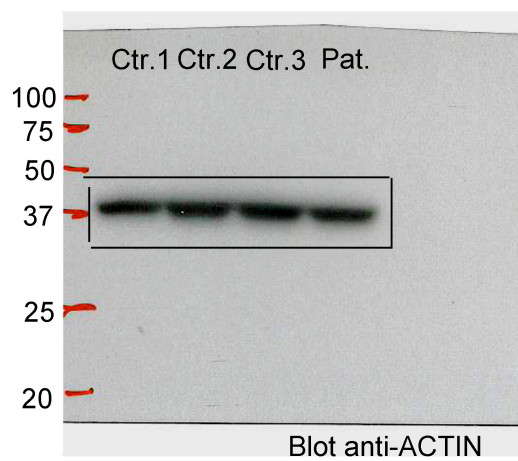

SourceData Figure Panel D

Supplement: JEM_20211682_SourceDataF3.pdf [file JEM_20211682_SourceDataF3.pdf]

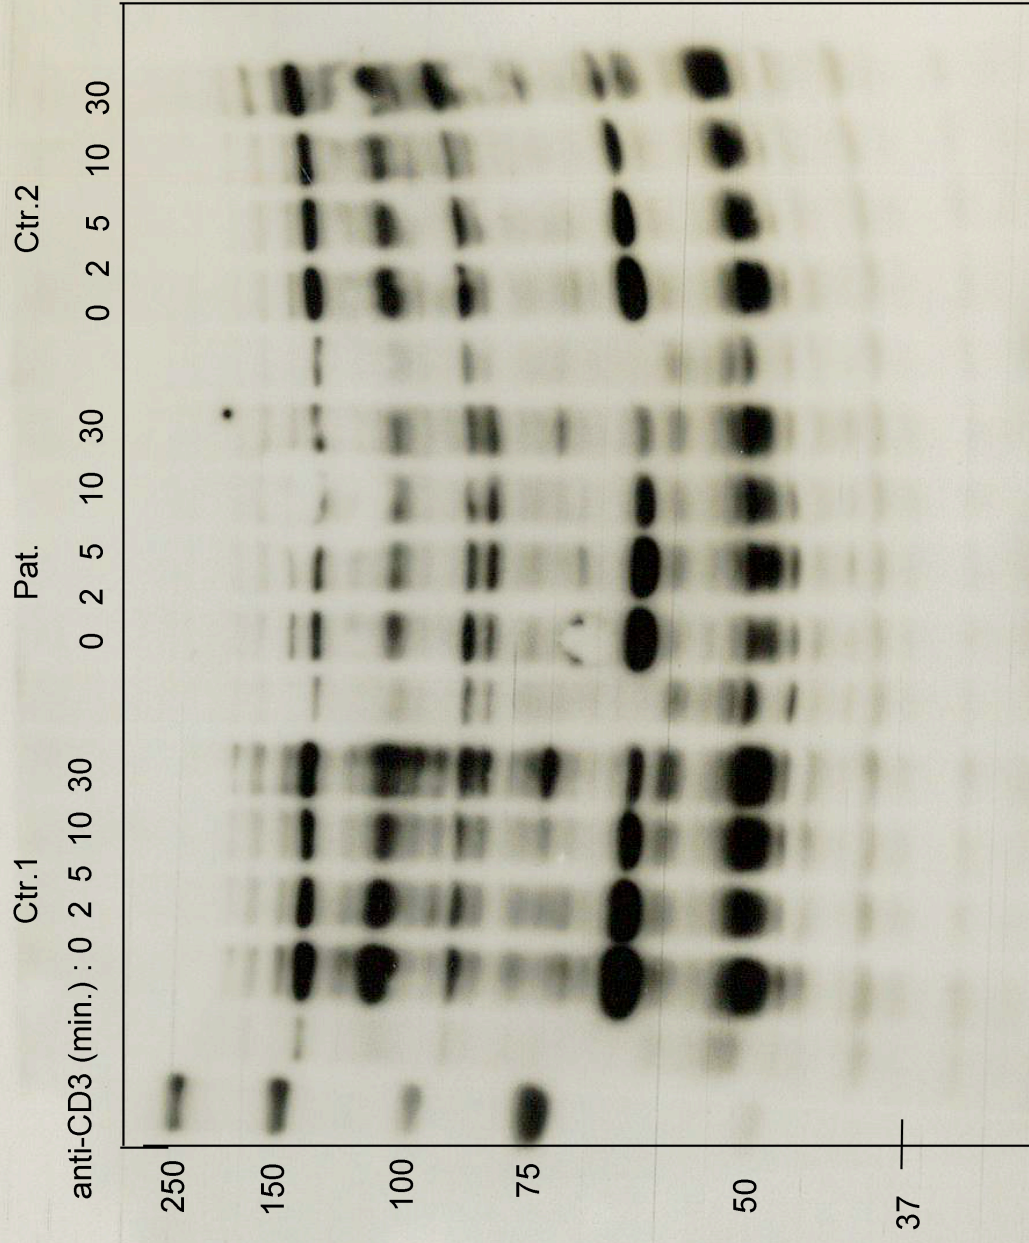

Blot anti-PY

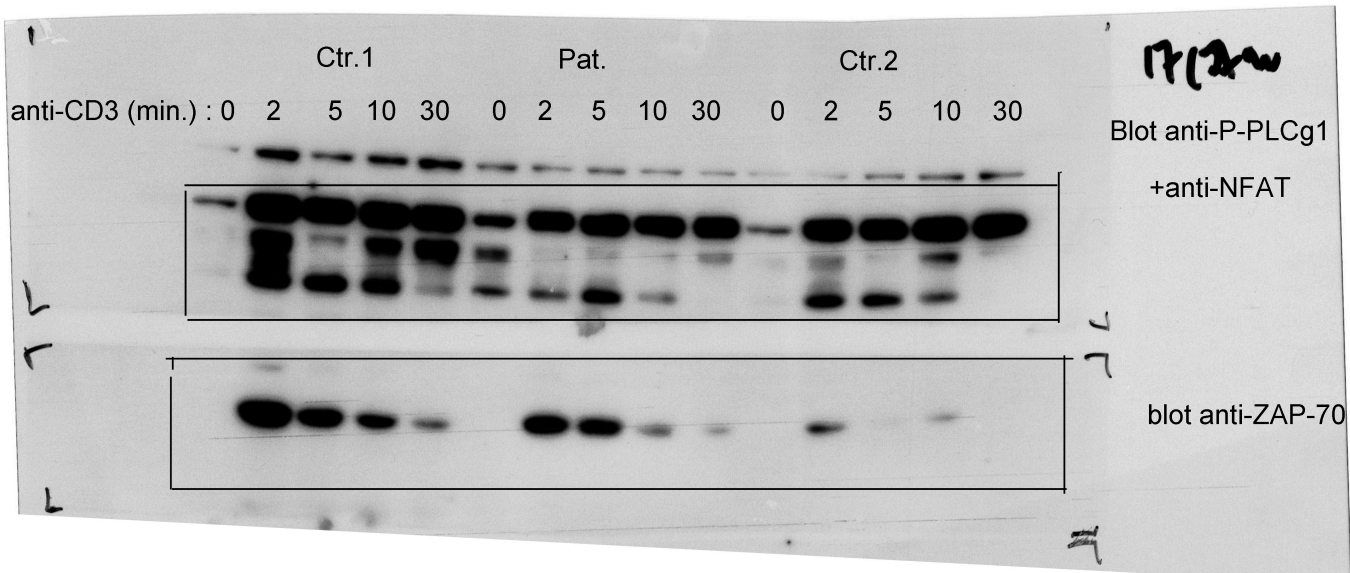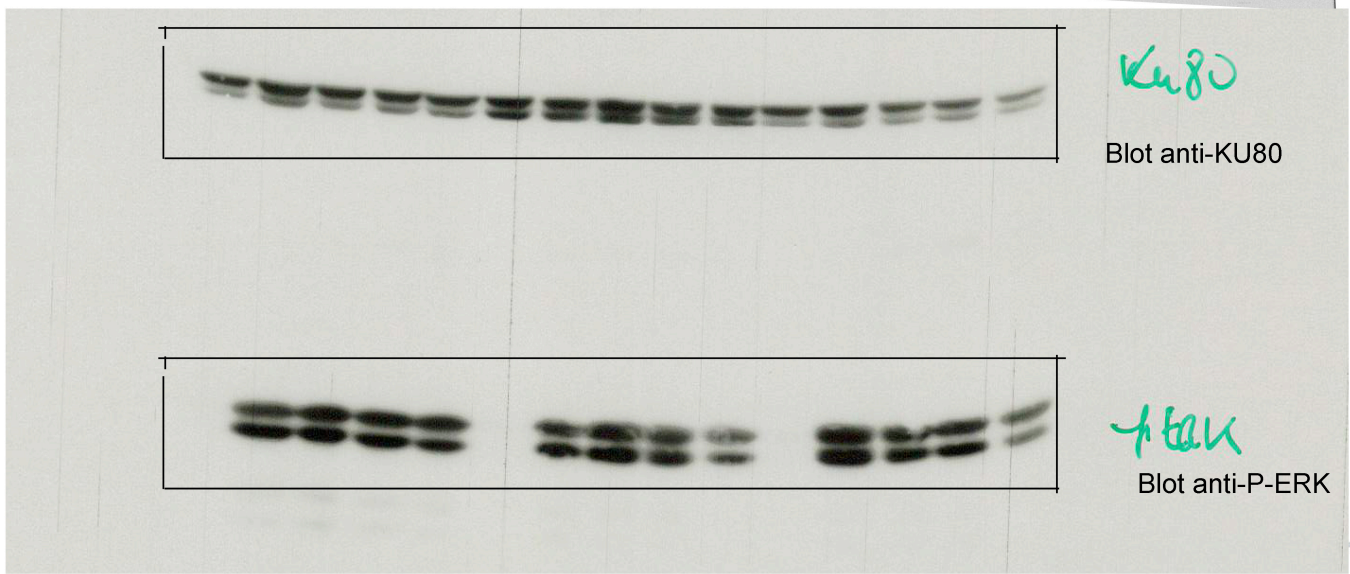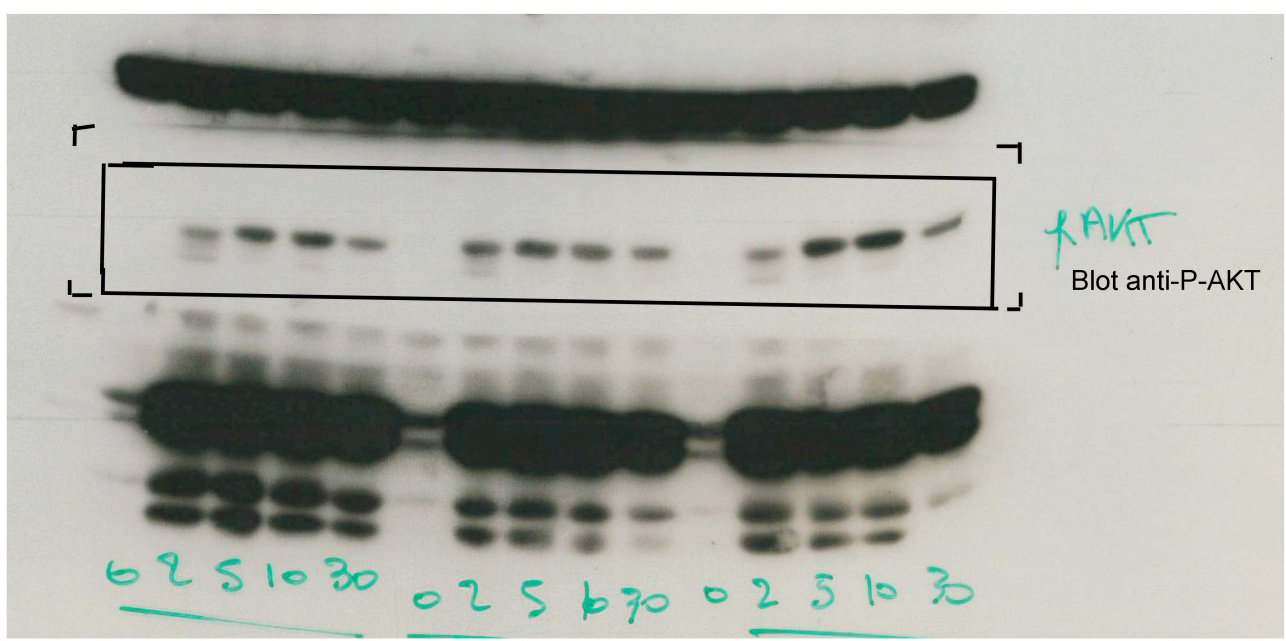

SourceData for Supplementary Figure 1 panel B

Supplement: JEM_20211682_SourceDataFS1.pdf [file JEM_20211682_SourceDataFS1.pdf]

10 min

Jurkat HEK Crt. LCL Pat. LCL

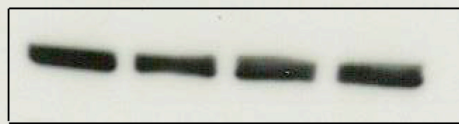

- 100  
- 75

KU80  
anti-KU80

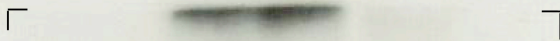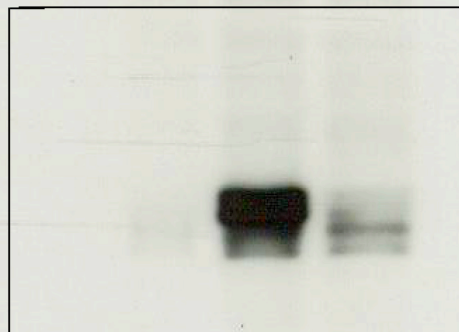

- 37  
- 25  
- 20  
- 10

CD137L  
anti-CD137L

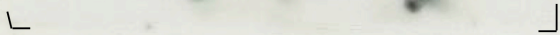

Supplement: JEM_20211682_SourceDataFS2.pdf [file JEM_20211682_SourceDataFS2.pdf]
